# Supplementary material for: Molecular identification of SARS-CoV-2 variants of concern at urban wastewater treatment plants across South Africa
Source: bioRxiv or medRxiv preprint supplement (doi:10.1101/2022.12.15.22283506), 2022-12-16
Supplement: Supplementary file [file media-1.pdf]

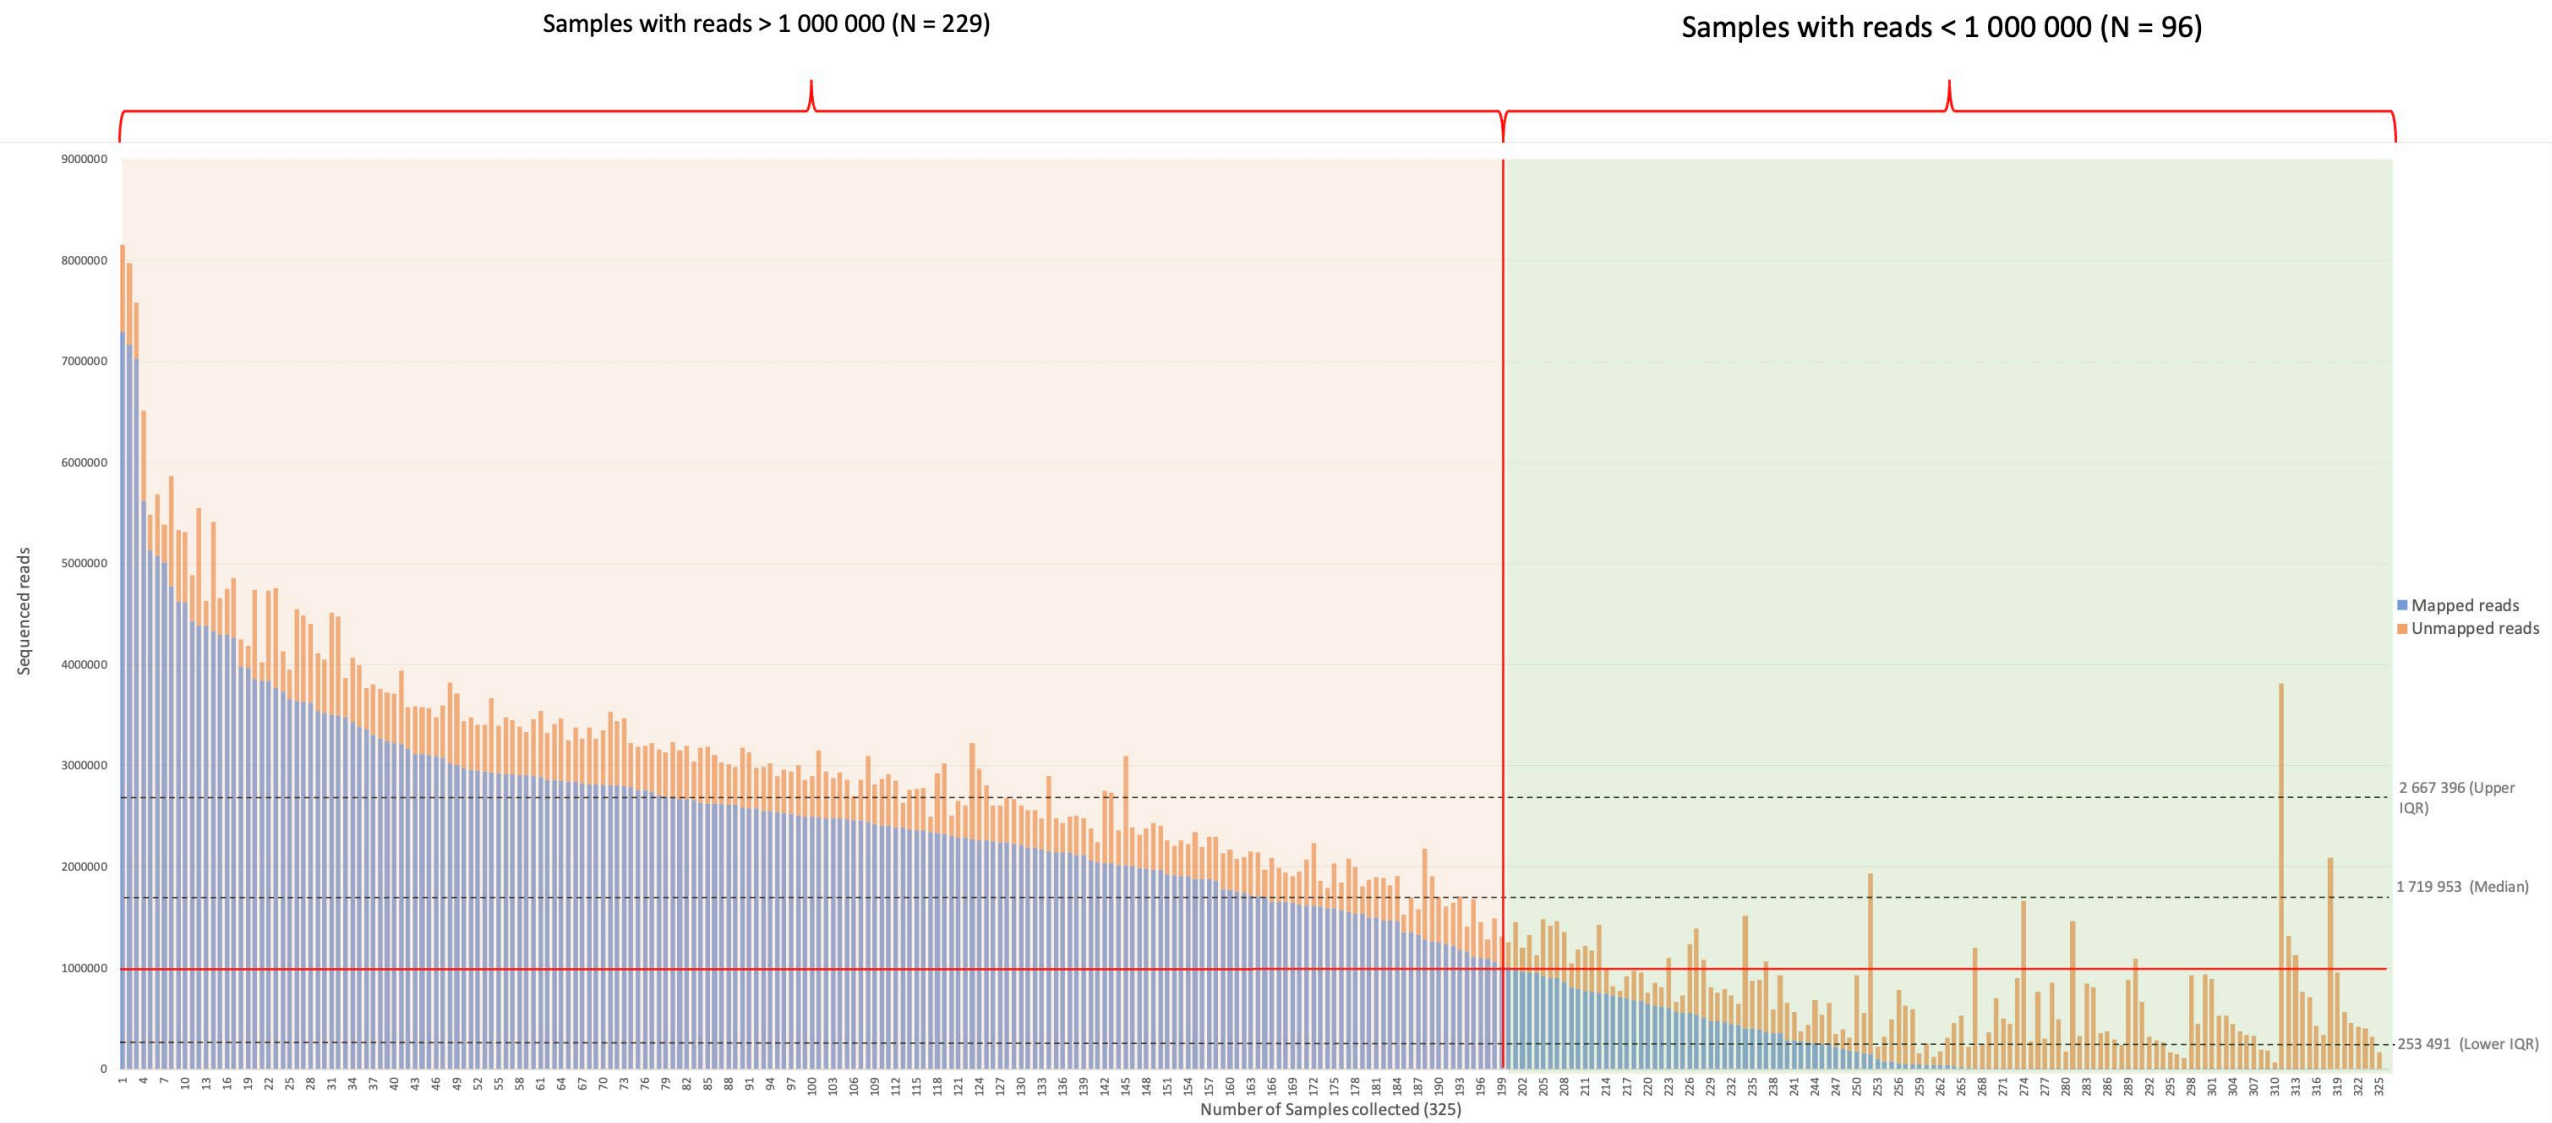

Figure S1
